# Supplementary material
Source: publisher figshare collection journal article supplement (https://acs.figshare.com/ndownloader/files/17930153)
Supplement: Supplementary file 1 [file 17930153]

## Enzalutamide and Apalutamide: In Vitro Chemical Reactivity Studies and Activity in a Mouse Drug Allergy Model

Changhua Ji,<sup>†</sup> Mausumee Guha,<sup>†</sup> Xu Zhu,<sup>‡</sup> Jessica Whritenour,<sup>‡</sup> Michelle Hemkens,<sup>†</sup> Susanna Tse,<sup>§</sup> Gregory S. Walker,<sup>§</sup> Ellen Evans,<sup>‡</sup> Nasir K. Khan,<sup>||</sup> Martin B. Finkelstein,<sup>||</sup> Ernesto Callegari,<sup>§</sup> and R. Scott Obach<sup>§</sup>

<sup>†</sup>Drug Safety Research and Development, Pfizer Inc., La Jolla, CA, USA; <sup>‡</sup>Drug Safety Research and Development, Pfizer Inc., Groton, CT, USA; <sup>§</sup>Pharmacokinetics, Dynamics, and Drug Metabolism, Pfizer Inc., Groton, CT, USA; <sup>||</sup>Drug Safety Research and Development, Pfizer Inc., Pearl River, NY, USA

### Table of Contents

#### Supplemental Data

|                                                                                         |   |
|-----------------------------------------------------------------------------------------|---|
| Supplemental Figure 1. Timecourse of apalutamide reaction with GSH .....                | 2 |
| Supplemental Figure 2. The 1H-1H COSY Spectrum of the m/z 583 isolate.....              | 3 |
| Supplemental Figure 3. The 1H-13C multiplicity edited HSQC of the m/z 583 isolate ..... | 4 |
| Supplemental Figure 4. The 1H-1H COSY spectrum of the m/z 639 isolate .....             | 5 |
| Supplemental Figure 5. The 1H-13C multiplicity edited HSQC of the m/z 639 isolate ..... | 6 |
| Supplemental Figure 6. The 1H-13C HMBC spectrum of the m/z 639 isolate.....             | 7 |

#### Supplemental Information

|                                              |   |
|----------------------------------------------|---|
| CEREP assay references .....                 | 8 |
| Thermo Fisher Z'-LYTE assay references ..... | 9 |

## Supplemental Data

Supplemental Figure 1. Timecourse of apalutamide reaction with GSH. GSH, glutathione.

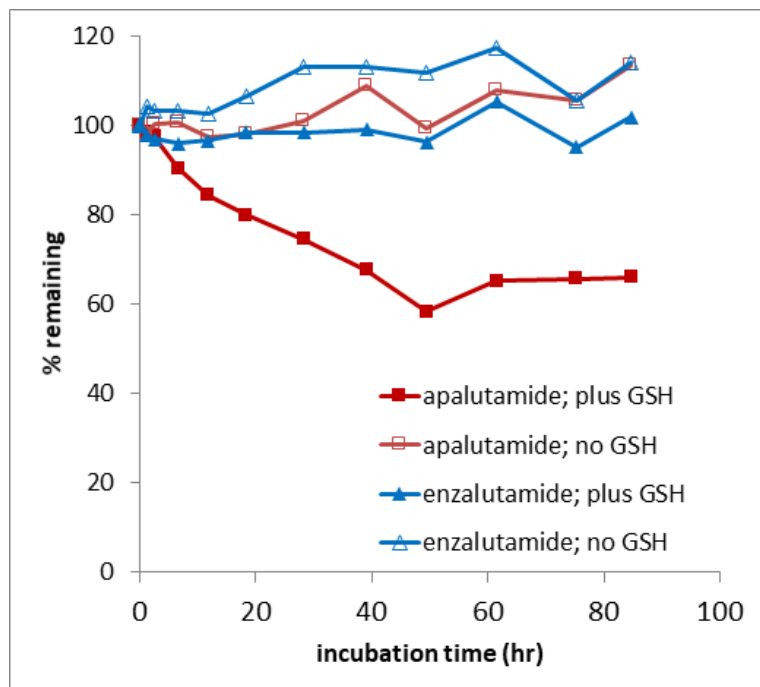

Supplemental Figure 2. The  $^1\text{H}$ - $^1\text{H}$  COSY Spectrum of the m/z 583 isolate. COSY, correlated spectroscopy.

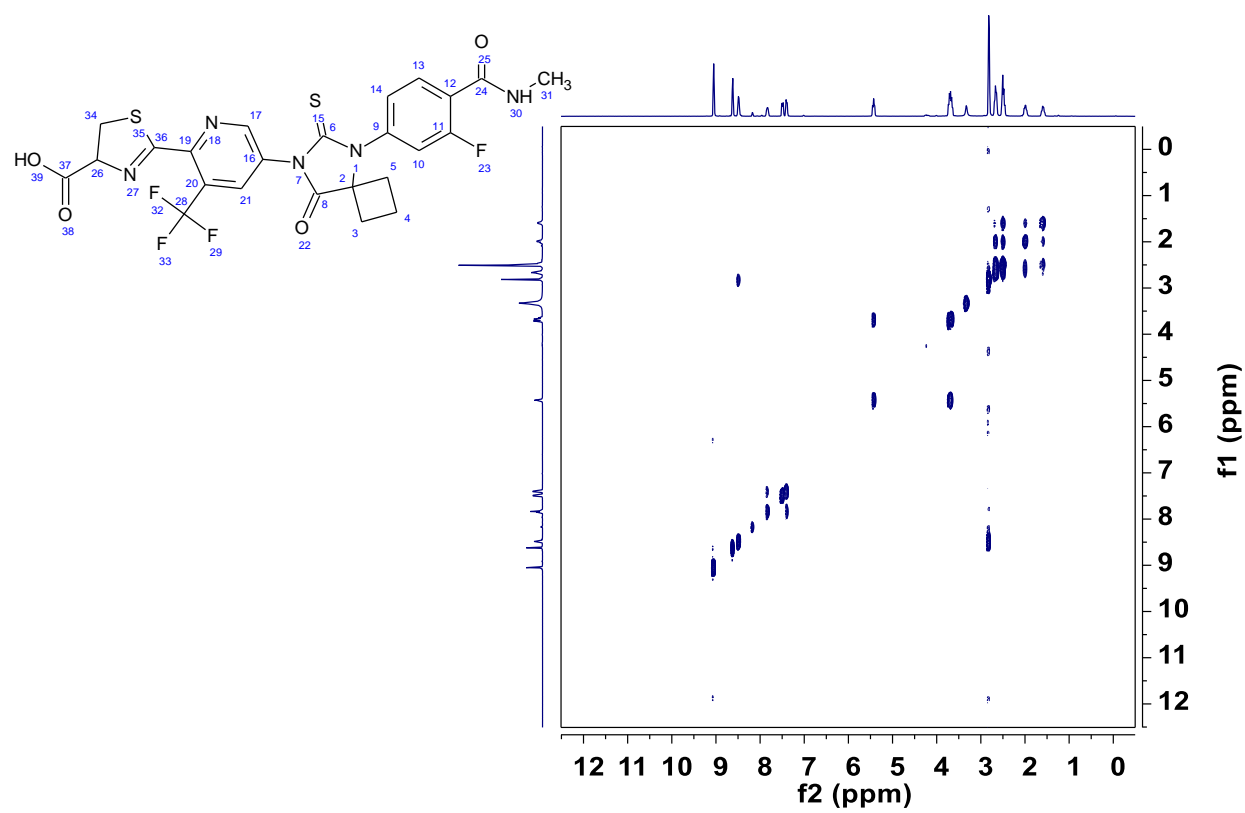

Supplemental Figure 3. The  $^1\text{H}$ - $^{13}\text{C}$  multiplicity edited HSQC of the  $m/z$  583 isolate. HSQC, heteronuclear single quantum coherence.

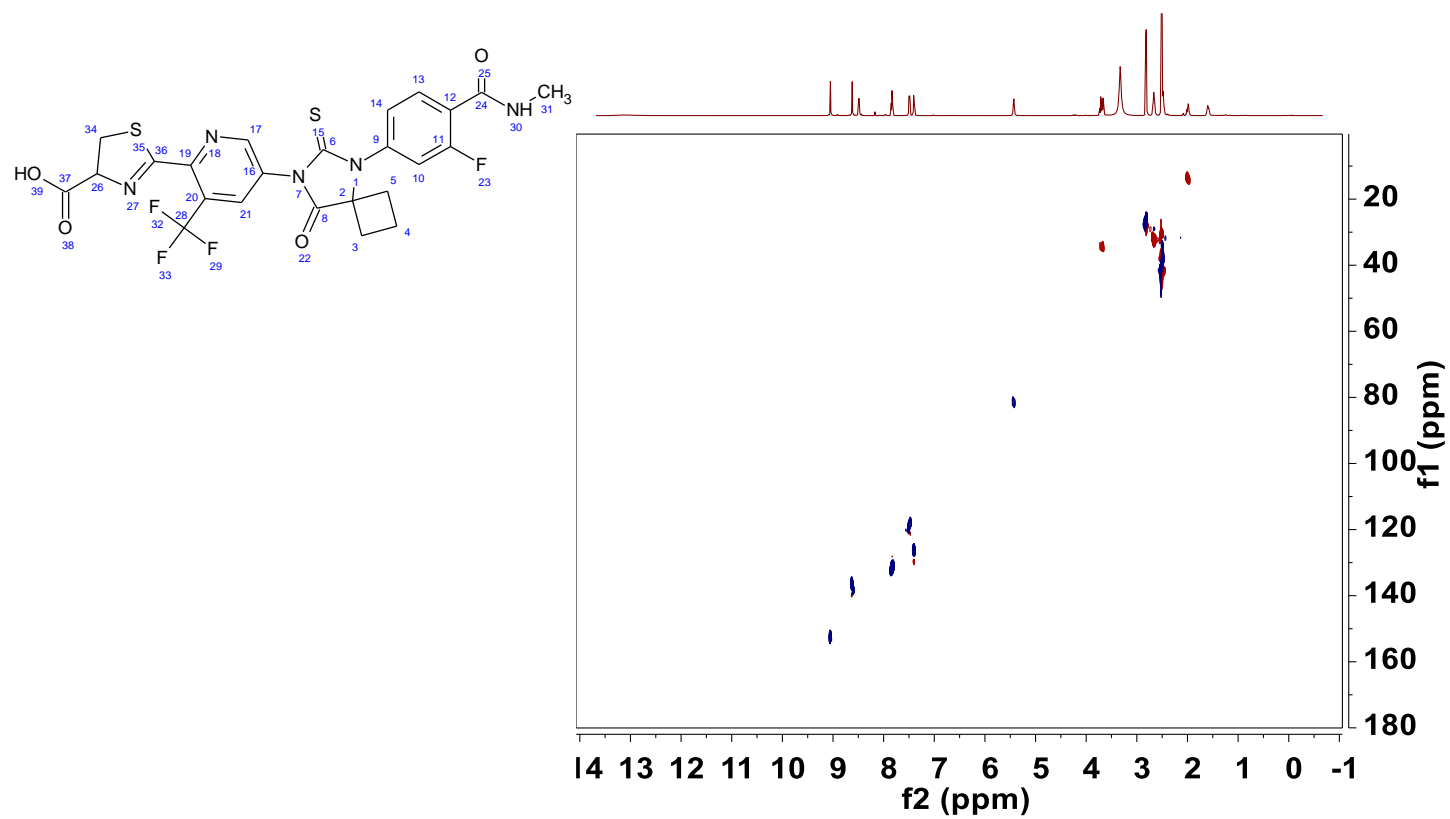

Supplemental Figure 4. The  $^1\text{H}$ - $^1\text{H}$  COSY spectrum of the m/z 639 isolate. COSY, correlated spectroscopy.

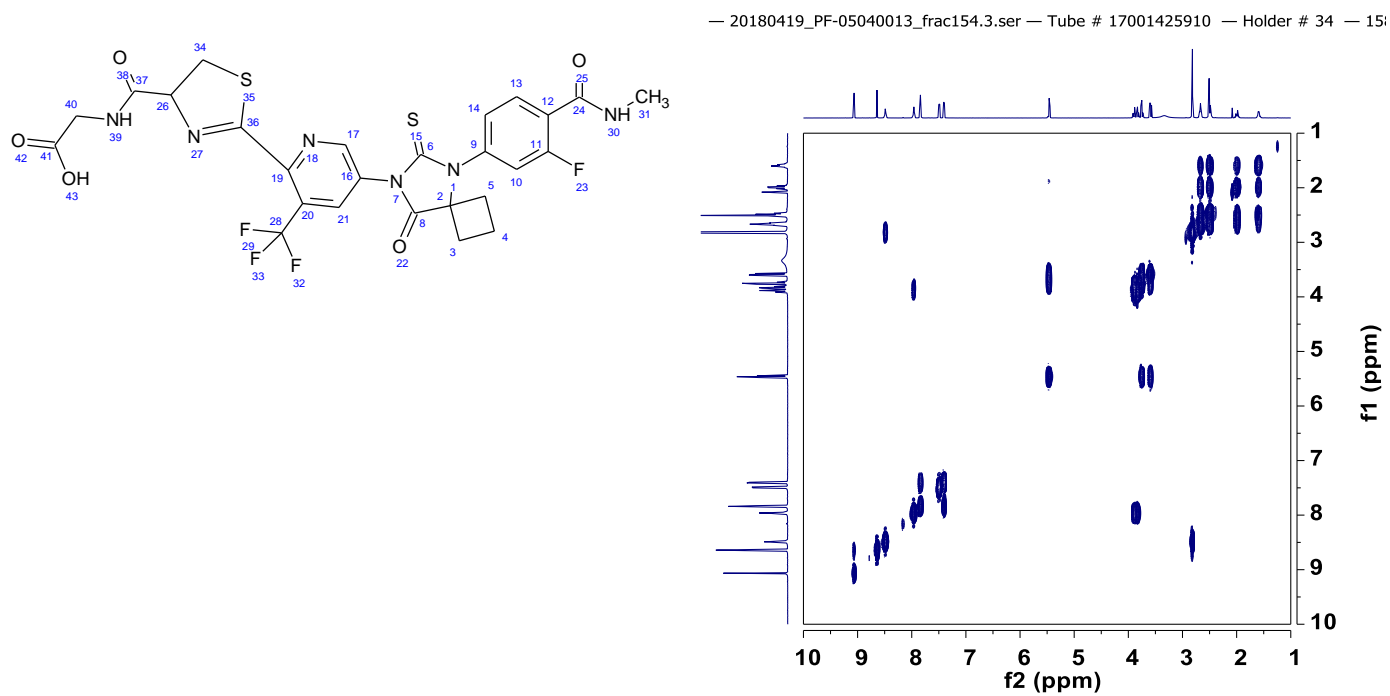

Supplemental Figure 5. The  $^1\text{H}$ - $^{13}\text{C}$  multiplicity edited HSQC of the m/z 639 isolate. HSQC, heteronuclear single quantum coherence.

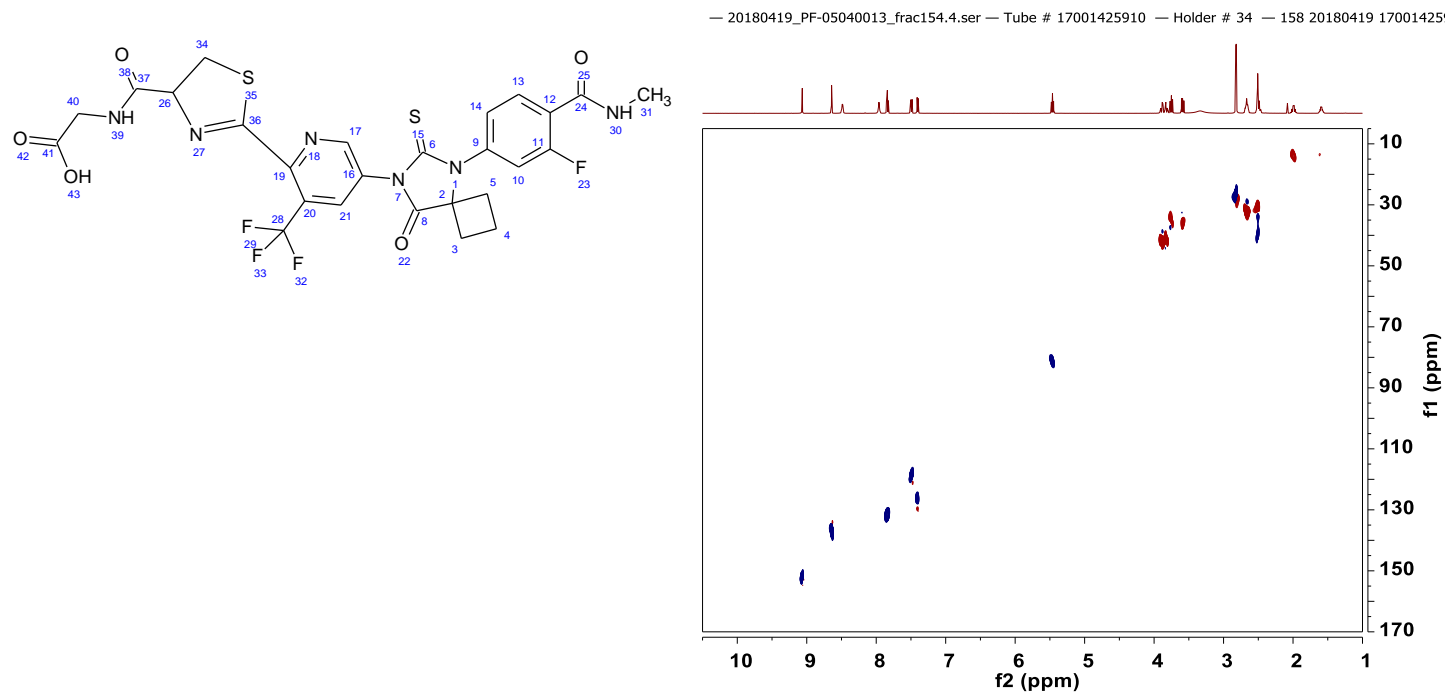

Supplemental Figure 6. The  $^1\text{H}$ - $^{13}\text{C}$  HMBC spectrum of the m/z 639 isolate. HMBC, heteronuclear multiple bond correlation.

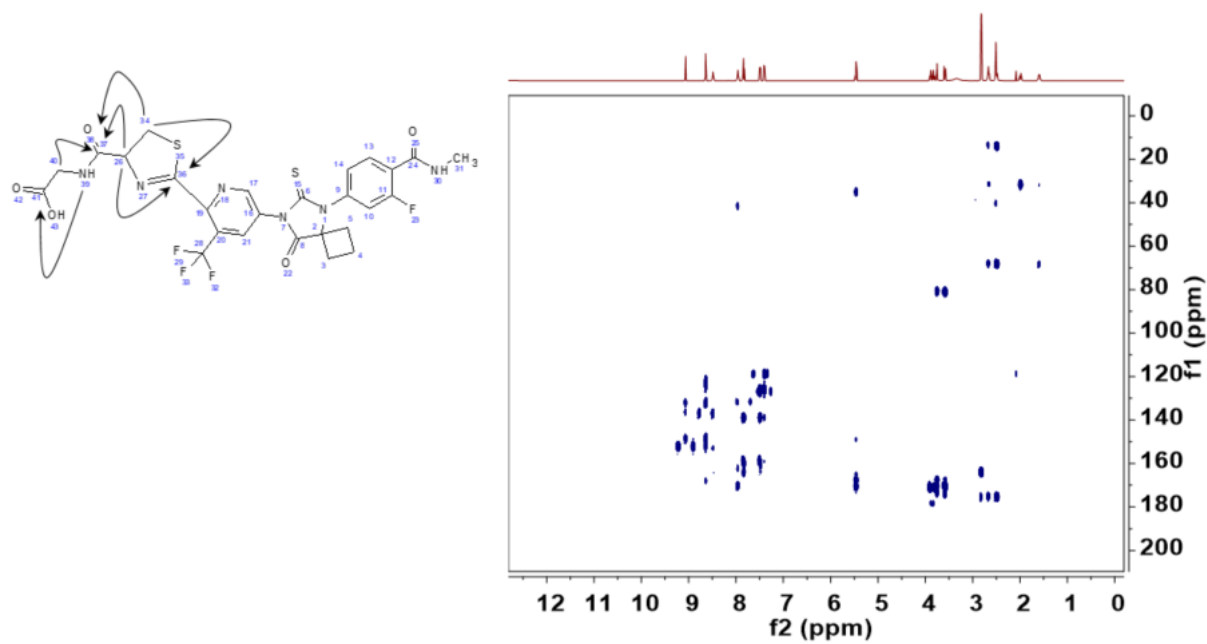

## Supplemental Information

CEREP assay references from <https://www.eurofinsdiscoveryservices.com/>.

| Family      | Name                                                                                | Item |
|-------------|-------------------------------------------------------------------------------------|------|
| GPCR        | 5-HT1A Human Serotonin GPCR Binding (Agonist Radioligand) Assay                     | 131  |
| GPCR        | 5-HT1B Rat Serotonin GPCR Binding (Antagonist Radioligand) Assay                    | 132  |
| GPCR        | 5-HT2A Human Serotonin GPCR Binding (Agonist Radioligand) Assay                     | 471  |
| GPCR        | 5-HT2B Human Serotonin GPCR [125I](±)DOI Binding (Agonist Radioligand) Assay        | 1333 |
| GPCR        | 5-HT7 Human Serotonin GPCR Binding (Agonist Radioligand) Assay                      | 144  |
| GPCR        | A2A Human Adenosine GPCR Binding (Agonist Radioligand) Assay                        | 4    |
| GPCR        | alpha1 (Non-Selective) Rat Adrenoceptor GPCR Binding (Antagonist Radioligand) Assay | 8    |
| GPCR        | alpha2B Human Adrenoceptor GPCR Binding (Antagonist Radioligand) Assay              | 1344 |
| GPCR        | beta1 Human Adrenoceptor GPCR Binding (Agonist Radioligand) Assay                   | 18   |
| GPCR        | beta2 Human Adrenoceptor GPCR Binding (Antagonist Radioligand) Assay                | 20   |
| GPCR        | CB1 Human Cannabinoid GPCR Binding (Agonist Radioligand) Assay                      | 36   |
| GPCR        | CB2 Human Cannabinoid GPCR Binding (Agonist Radioligand) Assay                      | 37   |
| GPCR        | CCK1 (CCKA) Human Cholecystokinin GPCR Binding (Agonist Radioligand) Assay          | 39   |
| GPCR        | CCK2 (CCKB) Human Cholecystokinin GPCR Binding (Agonist Radioligand) Assay          | 41   |
| GPCR        | D1 Human Dopamine GPCR Binding (Antagonist Radioligand) Assay                       | 44   |
| GPCR        | D2S Human Dopamine GPCR Binding (Agonist Radioligand) Assay                         | 1322 |
| GPCR        | delta (DOP) Human Opioid GPCR Binding (Agonist Radioligand) Assay                   | 114  |
| GPCR        | H1 Human Histamine GPCR Binding (Antagonist Radioligand) Assay                      | 870  |
| GPCR        | H3 Human Histamine GPCR Binding (Agonist Radioligand) Assay                         | 1332 |
| GPCR        | kappa (KOP) Rat Opioid GPCR Binding (Agonist Radioligand) Assay                     | 1971 |
| GPCR        | M1 Human Acetylcholine (Muscarinic) GPCR Binding (Antagonist Radioligand) Assay     | 91   |
| GPCR        | M3 Human Acetylcholine (Muscarinic) GPCR Binding (Antagonist Radioligand) Assay     | 95   |
| GPCR        | mu (MOP) Human Opioid GPCR Binding (Agonist Radioligand) Assay                      | 118  |
| GPCR        | NK2 Human Tachykinin GPCR Binding (Agonist Radioligand) Assay                       | 102  |
| GPCR        | UT (GPR14) Human Urotensin GPCR Binding (Agonist Radioligand) Assay                 | 1386 |
| Ion Channel | 5-HT3 Human Serotonin Ion Channel Binding (Antagonist Radioligand) Assay            | 411  |



|                             |                                                                                            |      |
|-----------------------------|--------------------------------------------------------------------------------------------|------|
| Ion Channel                 | Cav1.2 (L-type) Rat Calcium Ion Channel Binding (Dihydropyridine Site) Assay               | 161  |
| Ion Channel                 | Cav1.2 (L-type) Rat Calcium Ion Channel Binding (Diltiazem Site) Assay                     | 162  |
| Ion Channel                 | Cav1.2 (L-type) Rat Calcium Ion Channel Binding (Verapamil Site) Assay                     | 163  |
| Ion Channel                 | Glutamate (AMPA, Non-Selective) Rat Ion Channel [3H] AMPA Binding Assay                    | 64   |
| Ion Channel                 | Glutamate (Non-Selective) Rat Ion Channel [3H] TCP Binding Assay                           | 124  |
| Ion Channel                 | nAChR (Muscle-Type) Human Ion Channel Binding (Antagonist Radioligand) Assay               | 936  |
| Ion Channel                 | Non-Selective Rat GABAA Ion Channel [35S] TBPS Binding (Antagonist Radioligand) Assay      | 170  |
| Ion Channel                 | Non-Selective Rat GABAA Ion Channel [3H] Flunitrazepam Binding (Agonist Radioligand) Assay | 28   |
| Ion Channel                 | Non-Selective Rat Sodium Ion Channel [3H] Batrachotoxinin Binding (Site 2) Assay           | 169  |
| Neurotransmitter Metabolism | Acetylcholinesterase Human Enzymatic Assay                                                 | 363  |
| Neurotransmitter Metabolism | Monoamine Oxidase A (MAO-A) Rat Binding (Antagonist Radioligand) Assay                     | 443  |
| Nuclear Hormone Receptor    | AR Human Androgen NHR Binding (Agonist Radioligand) Assay                                  | 933  |
| Nuclear Hormone Receptor    | GR Human Glucocorticoid NHR Binding (Agonist Radioligand) Assay                            | 469  |
| Nuclear Hormone Receptor    | PPARgamma Human NHR Binding (Agonist Radioligand) Assay                                    | 641  |
| Protease                    | ACE Human Angiotensin-Converting Metallo Peptidase Enzymatic Assay                         | 3441 |
| Transporter                 | CHT1 Human Choline Transporter Binding (Antagonist Radioligand) Assay                      | 1552 |
| Transporter                 | DAT Human Dopamine Transporter Binding (Antagonist Radioligand) Assay                      | 52   |
| Transporter                 | GABA (Non-Selective) Rat Transporter Binding (Antagonist Radioligand) Assay                | 60   |
| Transporter                 | NET Human Norepinephrine Transporter Binding (Antagonist Radioligand) Assay                | 355  |
| Transporter                 | SET Human Serotonin Transporter Binding (Antagonist Radioligand) Assay                     | 439  |

Thermo Fisher Z'-LYTE assay references from <https://www.thermofisher.com/us/en/home/products-and-services/services/custom-services/screening-and-profiling-services/selectscreen-profiling-service/selectscreen-kinase-profiling-service.html>.

### **ABL1**

The 2X ABL1 / Tyr 02 mixture is prepared in 50 mM HEPES pH 7.5, 0.01% BRIJ-35, 10 mM MgCl<sub>2</sub>, 1 mM EGTA. The final 10  $\mu$ L Kinase Reaction consists of 0.31 - 2 ng ABL1 and 2  $\mu$ M

Tyr 02 in 50 mM HEPES pH 7.5, 0.01% BRIJ-35, 10 mM MgCl<sub>2</sub>, 1 mM EGTA. After the 1 hour Kinase Reaction incubation, 5 µL of a 1:128 dilution of Development Reagent A is added.

#### **AKT1 (PKB alpha)**

The 2X AKT1 (PKB alpha) / Ser/Thr 06 mixture is prepared in 50 mM HEPES pH 7.5, 0.01% BRIJ-35, 10 mM MgCl<sub>2</sub>, 1 mM EGTA. The final 10 µL Kinase Reaction consists of 0.82 - 12 ng AKT1 (PKB alpha) and 2 µM Ser/Thr 06 in 50 mM HEPES pH 7.5, 0.01% BRIJ-35, 10 mM MgCl<sub>2</sub>, 1 mM EGTA. After the 1 hour Kinase Reaction incubation, 5 µL of a 1:4096 dilution of Development Reagent A is added.

#### **AURKA (Aurora A)**

The 2X AURKA (Aurora A) / Ser/Thr 01 mixture is prepared in 50 mM HEPES pH 7.5, 0.01% BRIJ-35, 10 mM MgCl<sub>2</sub>, 1 mM EGTA. The final 10 µL Kinase Reaction consists of 0.75 - 3.64 ng AURKA (Aurora A) and 2 µM Ser/Thr 01 in 50 mM HEPES pH 7.5, 0.01% BRIJ-35, 10 mM MgCl<sub>2</sub>, 1 mM EGTA. After the 1 hour Kinase Reaction incubation, 5 µL of a 1:4096 dilution of Development Reagent A is added.

#### **BTK**

The 2X BTK / Tyr 01 mixture is prepared in 50 mM HEPES pH 7.5, 0.01% BRIJ-35, 10 mM MgCl<sub>2</sub>, 1 mM EGTA. The final 10 µL Kinase Reaction consists of 1.04 - 10.4 ng BTK and 2 µM Tyr 01 in 50 mM HEPES pH 7.5, 0.01% BRIJ-35, 10 mM MgCl<sub>2</sub>, 1 mM EGTA. After the 1 hour Kinase Reaction incubation, 5 µL of a 1:128 dilution of Development Reagent B is added.

#### **CAMK2A (CaMKII alpha)**

The 2X CAMK2A (CaMKII alpha) / Ser/Thr 04 mixture is prepared in 50 mM HEPES pH 7.5, 0.01% BRIJ-35, 10 mM MgCl<sub>2</sub>, 1 mM EGTA, 4 mM CaCl<sub>2</sub>, 800 U/ml Calmodulin, 0.02% NaN<sub>3</sub>. The final 10 µL Kinase Reaction consists of 0.27 - 1.2 ng CAMK2A (CaMKII alpha) and 2 µM Ser/Thr 04 in 50 mM HEPES pH 7.5, 0.01% BRIJ-35, 10 mM MgCl<sub>2</sub>, 1 mM EGTA, 2 mM CaCl<sub>2</sub>, 400 U/ml Calmodulin, 0.01% NaN<sub>3</sub>. After the 1 hour Kinase Reaction incubation, 5 µL of a 1:1024 dilution of Development Reagent A is added.

#### **CDK2/cyclin A**

The 2X CDK2/cyclin A / Ser/Thr 12 mixture is prepared in 50 mM HEPES pH 7.5, 0.01% BRIJ-35, 10 mM MgCl<sub>2</sub>, 1 mM EGTA. The final 10 µL Kinase Reaction consists of 1.22 - 10.3 ng CDK2/cyclin A and 2 µM Ser/Thr 12 in 50 mM HEPES pH 7.5, 0.01% BRIJ-35, 10 mM MgCl<sub>2</sub>, 1 mM EGTA. After the 1 hour Kinase Reaction incubation, 5 µL of a 1:4096 dilution of Development Reagent A is added.

#### **CHEK1 (CHK1)**

The 2X CHEK1 (CHK1) / Ser/Thr 19 mixture is prepared in 50 mM HEPES pH 7.5, 0.01% BRIJ-35, 10 mM MgCl<sub>2</sub>, 1 mM EGTA. The final 10 µL Kinase Reaction consists of 2.38 - 100 ng CHEK1 (CHK1) and 2 µM Ser/Thr 19 in 50 mM HEPES pH 7.5, 0.01% BRIJ-35, 10 mM

MgCl<sub>2</sub>, 1 mM EGTA. After the 1 hour Kinase Reaction incubation, 5 µL of a 1:256 dilution of Development Reagent A is added.

#### **CHEK2 (CHK2)**

The 2X CHEK2 (CHK2) / Ser/Thr 07 mixture is prepared in 50 mM HEPES pH 7.5, 0.01% BRIJ-35, 10 mM MgCl<sub>2</sub>, 1 mM EGTA. The final 10 µL Kinase Reaction consists of 5.51 - 40 ng CHEK2 (CHK2) and 2 µM Ser/Thr 07 in 50 mM HEPES pH 7.5, 0.01% BRIJ-35, 10 mM MgCl<sub>2</sub>, 1 mM EGTA. After the 1 hour Kinase Reaction incubation, 5 µL of a 1:45000 dilution of Development Reagent A is added.

#### **CSNK1A1 (CK1 alpha 1)**

The 2X CSNK1A1 (CK1 alpha 1) / Ser/Thr 11 mixture is prepared in 50 mM HEPES pH 7.5, 0.01% BRIJ-35, 10 mM MgCl<sub>2</sub>, 1 mM EGTA, 2 mM DTT. The final 10 µL Kinase Reaction consists of 2.6 - 13.5 ng CSNK1A1 (CK1 alpha 1) and 2 µM Ser/Thr 11 in 50 mM HEPES pH 7.5, 0.01% BRIJ-35, 10 mM MgCl<sub>2</sub>, 1 mM EGTA, 1 mM DTT. After the 1 hour Kinase Reaction incubation, 5 µL of a 1:16 dilution of Development Reagent B is added.

#### **CSNK2A2 (CK2 alpha 2)**

The 2X CSNK2A2 (CK2 alpha 2) / Ser/Thr 11 mixture is prepared in 50 mM HEPES pH 7.5, 0.01% BRIJ-35, 10 mM MgCl<sub>2</sub>, 1 mM EGTA. The final 10 µL Kinase Reaction consists of 2.6 - 31.5 ng CSNK2A2 (CK2 alpha 2) and 2 µM Ser/Thr 11 in 50 mM HEPES pH 7.5, 0.01% BRIJ-35, 10 mM MgCl<sub>2</sub>, 1 mM EGTA. After the 1 hour Kinase Reaction incubation, 5 µL of a 1:16 dilution of Development Reagent B is added.

#### **EGFR (ErbB1)**

The 2X EGFR (ErbB1) / Tyr 04 mixture is prepared in 50 mM HEPES pH 7.5, 0.01% BRIJ-35, 10 mM MgCl<sub>2</sub>, 4 mM MnCl<sub>2</sub>, 1 mM EGTA, 2 mM DTT. The final 10 µL Kinase Reaction consists of 1.1 - 8 ng EGFR (ErbB1) and 2 µM Tyr 04 in 50 mM HEPES pH 7.5, 0.01% BRIJ-35, 10 mM MgCl<sub>2</sub>, 2 mM MnCl<sub>2</sub>, 1 mM EGTA, 1 mM DTT. After the 1 hour Kinase Reaction incubation, 5 µL of a 1:64 dilution of Development Reagent B is added.

#### **EPHA2**

The 2X EPHA2 / Tyr 01 mixture is prepared in 50 mM HEPES pH 7.5, 0.01% BRIJ-35, 10 mM MgCl<sub>2</sub>, 1 mM EGTA. The final 10 µL Kinase Reaction consists of 2.1 - 40 ng EPHA2 and 2 µM Tyr 01 in 50 mM HEPES pH 7.5, 0.01% BRIJ-35, 10 mM MgCl<sub>2</sub>, 1 mM EGTA. After the 1 hour Kinase Reaction incubation, 5 µL of a 1:128 dilution of Development Reagent B is added.

#### **FGFR1**

The 2X FGFR1 / Tyr 04 mixture is prepared in 50 mM HEPES pH 7.5, 0.01% BRIJ-35, 10 mM MgCl<sub>2</sub>, 4 mM MnCl<sub>2</sub>, 1 mM EGTA, 2 mM DTT. The final 10 µL Kinase Reaction consists of 0.45 - 2.45 ng FGFR1 and 2 µM Tyr 04 in 50 mM HEPES pH 7.5, 0.01% BRIJ-35, 10 mM MgCl<sub>2</sub>, 2 mM MnCl<sub>2</sub>, 1 mM EGTA, 1 mM DTT. After the 1 hour Kinase Reaction incubation, 5 µL of a 1:64 dilution of Development Reagent B is added.

**GSK3B (GSK3 beta)**

The 2X GSK3B (GSK3 beta) / Ser/Thr 09 mixture is prepared in 50 mM HEPES pH 7.5, 0.01% BRIJ-35, 10 mM MgCl<sub>2</sub>, 1 mM EGTA. The final 10 µL Kinase Reaction consists of 0.12 - 0.7 ng GSK3B (GSK3 beta) and 2 µM Ser/Thr 09 in 50 mM HEPES pH 7.5, 0.01% BRIJ-35, 10 mM MgCl<sub>2</sub>, 1 mM EGTA. After the 1 hour Kinase Reaction incubation, 5 µL of a 1:512 dilution of Development Reagent A is added.

**INSR**

The 2X INSR / Tyr 01 mixture is prepared in 50 mM HEPES pH 7.5, 0.01% BRIJ-35, 10 mM MgCl<sub>2</sub>, 4 mM MnCl<sub>2</sub>, 1 mM EGTA, 2 mM DTT. The final 10 µL Kinase Reaction consists of 1.94 - 50 ng INSR and 2 µM Tyr 01 in 50 mM HEPES pH 7.5, 0.01% BRIJ-35, 10 mM MgCl<sub>2</sub>, 2 mM MnCl<sub>2</sub>, 1 mM EGTA, 1 mM DTT. After the 1 hour Kinase Reaction incubation, 5 µL of a 1:128 dilution of Development Reagent B is added.

**IRAK4**

The 2X IRAK4 / Ser/Thr 07 mixture is prepared in 50 mM HEPES pH 7.5, 0.01% BRIJ-35, 10 mM MnCl<sub>2</sub>, 1 mM EGTA, 2 mM DTT, 0.02% NaN<sub>3</sub>. The final 10 µL Kinase Reaction consists of 3.45 - 63.6 ng IRAK4 and 2 µM Ser/Thr 07 in 50 mM HEPES pH 7.5, 0.01% BRIJ-35, 5 mM MgCl<sub>2</sub>, 5 mM MnCl<sub>2</sub>, 1 mM EGTA, 1 mM DTT, 0.01% NaN<sub>3</sub>. After the 1 hour Kinase Reaction incubation, 5 µL of a 1:45000 dilution of Development Reagent A is added.

**JAK3**

The 2X JAK3 / Tyr 06 mixture is prepared in 50 mM HEPES pH 7.5, 0.01% BRIJ-35, 10 mM MgCl<sub>2</sub>, 1 mM EGTA. The final 10 µL Kinase Reaction consists of 0.5 - 3.58 ng JAK3 and 2 µM Tyr 06 in 50 mM HEPES pH 7.5, 0.01% BRIJ-35, 10 mM MgCl<sub>2</sub>, 1 mM EGTA. After the 1 hour Kinase Reaction incubation, 5 µL of a 1:128 dilution of Development Reagent A is added.

**KDR (VEGFR2)**

The 2X KDR (VEGFR2) / Tyr 01 mixture is prepared in 50 mM HEPES pH 7.5, 0.01% BRIJ-35, 10 mM MgCl<sub>2</sub>, 1 mM EGTA. The final 10 µL Kinase Reaction consists of 0.75 - 15 ng KDR (VEGFR2) and 2 µM Tyr 01 in 50 mM HEPES pH 7.5, 0.01% BRIJ-35, 10 mM MgCl<sub>2</sub>, 1 mM EGTA. After the 1 hour Kinase Reaction incubation, 5 µL of a 1:128 dilution of Development Reagent B is added.

**LCK**

The 2X LCK / Tyr 02 mixture is prepared in 50 mM HEPES pH 7.5, 0.01% BRIJ-35, 10 mM MgCl<sub>2</sub>, 1 mM EGTA. The final 10 µL Kinase Reaction consists of 8.25 - 100 ng LCK and 2 µM Tyr 02 in 50 mM HEPES pH 7.5, 0.01% BRIJ-35, 10 mM MgCl<sub>2</sub>, 1 mM EGTA. After the 1 hour Kinase Reaction incubation, 5 µL of a 1:128 dilution of Development Reagent A is added.

**MAP4K4 (HGK)**

The 2X MAP4K4 (HGK) / Ser/Thr 07 mixture is prepared in 50 mM HEPES pH 7.5, 0.01% BRIJ-35, 10 mM MgCl<sub>2</sub>, 1 mM EGTA. The final 10 µL Kinase Reaction consists of 0.36 - 3 ng MAP4K4 (HGK) and 2 µM Ser/Thr 07 in 50 mM HEPES pH 7.5, 0.01% BRIJ-35, 10 mM

MgCl<sub>2</sub>, 1 mM EGTA. After the 1 hour Kinase Reaction incubation, 5 µL of a 1:45000 dilution of Development Reagent A is added.

#### **MAPK1 (ERK2)**

The 2X MAPK1 (ERK2) / Ser/Thr 03 mixture is prepared in 50 mM HEPES pH 7.5, 0.01% BRIJ-35, 10 mM MgCl<sub>2</sub>, 1 mM EGTA. The final 10 µL Kinase Reaction consists of 2 - 45.5 ng MAPK1 (ERK2) and 2 µM Ser/Thr 03 in 50 mM HEPES pH 7.5, 0.01% BRIJ-35, 10 mM MgCl<sub>2</sub>, 1 mM EGTA. After the 1 hour Kinase Reaction incubation, 5 µL of a 1:1024 dilution of Development Reagent A is added.

#### **MAPK14 (p38 alpha)**

The 2X MAPK14 (p38 alpha) / inactive MAPKAPK2 / Ser/Thr 04 mixture is prepared in 50 mM HEPES pH 7.5, 0.01% BRIJ-35, 10 mM MgCl<sub>2</sub>, 1 mM EGTA. The final 10 µL Kinase Reaction consists of 0.003 - 0.01 ng MAPK14 (p38 alpha), 6.5 ng inactive MAPKAPK2, and 2 µM Ser/Thr 04 in 50 mM HEPES pH 7.5, 0.01% BRIJ-35, 10 mM MgCl<sub>2</sub>, 1 mM EGTA. After the 1 hour Kinase Reaction incubation, 5 µL of a 1:1024 dilution of Development Reagent A is added.

#### **MAPKAPK2**

The 2X MAPKAPK2 / Ser/Thr 04 mixture is prepared in 50 mM HEPES pH 7.5, 0.01% BRIJ-35, 10 mM MgCl<sub>2</sub>, 1 mM EGTA. The final 10 µL Kinase Reaction consists of 0.04 - 0.18 ng MAPKAPK2 and 2 µM Ser/Thr 04 in 50 mM HEPES pH 7.5, 0.01% BRIJ-35, 10 mM MgCl<sub>2</sub>, 1 mM EGTA. After the 1 hour Kinase Reaction incubation, 5 µL of a 1:1024 dilution of Development Reagent A is added.

#### **MARK1 (MARK)**

The 2X MARK1 (MARK) / Ser/Thr 21 mixture is prepared in 50 mM HEPES pH 7.5, 0.01% BRIJ-35, 10 mM MgCl<sub>2</sub>, 1 mM EGTA. The final 10 µL Kinase Reaction consists of 14.9 - 168 ng MARK1 (MARK) and 2 µM Ser/Thr 21 in 50 mM HEPES pH 7.5, 0.01% BRIJ-35, 10 mM MgCl<sub>2</sub>, 1 mM EGTA. After the 1 hour Kinase Reaction incubation, 5 µL of a 1:4096 dilution of Development Reagent A is added.

#### **MET (cMet)**

The 2X MET (cMet) / Tyr 06 mixture is prepared in 50 mM HEPES pH 7.5, 0.01% BRIJ-35, 10 mM MgCl<sub>2</sub>, 1 mM EGTA. The final 10 µL Kinase Reaction consists of 0.49 - 7.84 ng MET (cMet) and 2 µM Tyr 06 in 50 mM HEPES pH 7.5, 0.01% BRIJ-35, 10 mM MgCl<sub>2</sub>, 1 mM EGTA. After the 1 hour Kinase Reaction incubation, 5 µL of a 1:128 dilution of Development Reagent A is added.

#### **MST4**

The 2X MST4 / Ser/Thr 07 mixture is prepared in 50 mM HEPES pH 7.5, 0.01% BRIJ-35, 10 mM MgCl<sub>2</sub>, 1 mM EGTA. The final 10 µL Kinase Reaction consists of 6 - 50 ng MST4 and 2 µM Ser/Thr 07 in 50 mM HEPES pH 7.5, 0.01% BRIJ-35, 10 mM MgCl<sub>2</sub>, 1 mM EGTA. After

the 1 hour Kinase Reaction incubation, 5  $\mu$ L of a 1:45000 dilution of Development Reagent A is added.

#### **MYLK2 (skMLCK)**

The 2X MYLK2 (skMLCK) / Ser/Thr 13 mixture is prepared in 50 mM HEPES pH 7.5, 0.01% BRIJ-35, 10 mM MgCl<sub>2</sub>, 1 mM EGTA, 4 mM CaCl<sub>2</sub>, 800 U/ml Calmodulin, 0.02% NaN<sub>3</sub>. The final 10  $\mu$ L Kinase Reaction consists of 3.13 - 15 ng MYLK2 (skMLCK) and 2  $\mu$ M Ser/Thr 13 in 50 mM HEPES pH 7.5, 0.01% BRIJ-35, 10 mM MgCl<sub>2</sub>, 1 mM EGTA, 2 mM CaCl<sub>2</sub>, 400 U/ml Calmodulin, 0.01% NaN<sub>3</sub>. After the 1 hour Kinase Reaction incubation, 5  $\mu$ L of a 1:1024 dilution of Development Reagent A is added.

#### **NTRK1 (TRKA)**

The 2X NTRK1 (TRKA) / Tyr 01 mixture is prepared in 50 mM HEPES pH 7.5, 0.01% BRIJ-35, 10 mM MgCl<sub>2</sub>, 1 mM EGTA. The final 10  $\mu$ L Kinase Reaction consists of 6 - 88.7 ng NTRK1 (TRKA) and 2  $\mu$ M Tyr 01 in 50 mM HEPES pH 7.5, 0.01% BRIJ-35, 10 mM MgCl<sub>2</sub>, 1 mM EGTA. After the 1 hour Kinase Reaction incubation, 5  $\mu$ L of a 1:128 dilution of Development Reagent B is added.

#### **PAK4**

The 2X PAK4 / Ser/Thr 20 mixture is prepared in 50 mM HEPES pH 7.5, 0.01% BRIJ-35, 10 mM MgCl<sub>2</sub>, 1 mM EGTA. The final 10  $\mu$ L Kinase Reaction consists of 0.1 - 0.75 ng PAK4 and 2  $\mu$ M Ser/Thr 20 in 50 mM HEPES pH 7.5, 0.01% BRIJ-35, 10 mM MgCl<sub>2</sub>, 1 mM EGTA. After the 1 hour Kinase Reaction incubation, 5  $\mu$ L of a 1:256 dilution of Development Reagent A is added.

#### **PDK1**

The 2X PDK1 / inactive AKT2 (PKB beta) / Ser/Thr 06 mixture is prepared in 50 mM HEPES pH 7.5, 0.01% BRIJ-35, 10 mM MgCl<sub>2</sub>, 1 mM EGTA. The final 10  $\mu$ L Kinase Reaction consists of 5 - 20 ng PDK1, 150 ng inactive AKT2 (PKB beta), and 2  $\mu$ M Ser/Thr 06 in 50 mM HEPES pH 7.5, 0.01% BRIJ-35, 10 mM MgCl<sub>2</sub>, 1 mM EGTA. After the 1 hour Kinase Reaction incubation, 5  $\mu$ L of a 1:4096 dilution of Development Reagent A is added.

#### **PIM2**

The 2X PIM2 / Ser/Thr 07 mixture is prepared in 50 mM HEPES pH 7.5, 0.01% BRIJ-35, 10 mM MgCl<sub>2</sub>, 1 mM EGTA. The final 10  $\mu$ L Kinase Reaction consists of 1.44 - 6.86 ng PIM2 and 2  $\mu$ M Ser/Thr 07 in 50 mM HEPES pH 7.5, 0.01% BRIJ-35, 10 mM MgCl<sub>2</sub>, 1 mM EGTA. After the 1 hour Kinase Reaction incubation, 5  $\mu$ L of a 1:45000 dilution of Development Reagent A is added.

#### **PRKACA (PKA)**

The 2X PRKACA (PKA) / Ser/Thr 01 mixture is prepared in 50 mM HEPES pH 7.5, 0.01% BRIJ-35, 10 mM MgCl<sub>2</sub>, 1 mM EGTA. The final 10  $\mu$ L Kinase Reaction consists of 0.01 - 0.14 ng PRKACA (PKA) and 2  $\mu$ M Ser/Thr 01 in 50 mM HEPES pH 7.5, 0.01% BRIJ-35, 10 mM

MgCl<sub>2</sub>, 1 mM EGTA. After the 1 hour Kinase Reaction incubation, 5 µL of a 1:4096 dilution of Development Reagent A is added.

#### **PRKCB2 (PKC beta II)**

The 2X PRKCB2 (PKC beta II) / Ser/Thr 07 mixture is prepared in 50 mM HEPES pH 7.5, 0.01% BRIJ-35, 10 mM MgCl<sub>2</sub>, 1 mM EGTA, 4 mM CaCl<sub>2</sub>, 2X Novel Lipid Mix, 0.02% NaN<sub>3</sub>. The final 10 µL Kinase Reaction consists of 0.04 - 0.56 ng PRKCB2 (PKC beta II) and 2 µM Ser/Thr 07 in 50 mM HEPES pH 7.5, 0.01% BRIJ-35, 10 mM MgCl<sub>2</sub>, 1 mM EGTA, 2 mM CaCl<sub>2</sub>, 1X Novel Lipid Mix, 0.01% NaN<sub>3</sub>. After the 1 hour Kinase Reaction incubation, 5 µL of a 1:45000 dilution of Development Reagent A is added.

#### **ROCK1**

The 2X ROCK1 / Ser/Thr 07 mixture is prepared in 50 mM HEPES pH 7.5, 0.01% BRIJ-35, 10 mM MgCl<sub>2</sub>, 1 mM EGTA. The final 10 µL Kinase Reaction consists of 1.1 - 8 ng ROCK1 and 2 µM Ser/Thr 07 in 50 mM HEPES pH 7.5, 0.01% BRIJ-35, 10 mM MgCl<sub>2</sub>, 1 mM EGTA. After the 1 hour Kinase Reaction incubation, 5 µL of a 1:45000 dilution of Development Reagent A is added.

#### **SGK (SGK1)**

The 2X SGK (SGK1) / Ser/Thr 06 mixture is prepared in 50 mM HEPES pH 7.5, 0.01% BRIJ-35, 10 mM MgCl<sub>2</sub>, 1 mM EGTA. The final 10 µL Kinase Reaction consists of 0.09 - 1 ng SGK (SGK1) and 2 µM Ser/Thr 06 in 50 mM HEPES pH 7.5, 0.01% BRIJ-35, 10 mM MgCl<sub>2</sub>, 1 mM EGTA. After the 1 hour Kinase Reaction incubation, 5 µL of a 1:4096 dilution of Development Reagent A is added.

#### **SRC**

The 2X SRC / Tyr 02 mixture is prepared in 50 mM HEPES pH 7.5, 0.01% BRIJ-35, 10 mM MgCl<sub>2</sub>, 1 mM EGTA. The final 10 µL Kinase Reaction consists of 1.54 - 36 ng SRC and 2 µM Tyr 02 in 50 mM HEPES pH 7.5, 0.01% BRIJ-35, 10 mM MgCl<sub>2</sub>, 1 mM EGTA. After the 1 hour Kinase Reaction incubation, 5 µL of a 1:128 dilution of Development Reagent A is added.

#### **STK3 (MST2)**

The 2X STK3 (MST2) / Ser/Thr 07 mixture is prepared in 50 mM HEPES pH 6.5, 0.01% BRIJ-35, 10 mM MgCl<sub>2</sub>, 1 mM EGTA, 0.02% NaN<sub>3</sub>. The final 10 µL Kinase Reaction consists of 6.25 - 38.7 ng STK3 (MST2) and 2 µM Ser/Thr 07 in 50 mM HEPES pH 7.0, 0.01% BRIJ-35, 10 mM MgCl<sub>2</sub>, 1 mM EGTA, 0.01% NaN<sub>3</sub>. After the 1 hour Kinase Reaction incubation, 5 µL of a 1:45000 dilution of Development Reagent A is added.

#### **TAOK2 (TAO1)**

The 2X TAOK2 (TAO1) / Ser/Thr 07 mixture is prepared in 50 mM HEPES pH 7.5, 0.01% BRIJ-35, 10 mM MgCl<sub>2</sub>, 1 mM EGTA. The final 10 µL Kinase Reaction consists of 2.4 - 11 ng TAOK2 (TAO1) and 2 µM Ser/Thr 07 in 50 mM HEPES pH 7.5, 0.01% BRIJ-35, 10 mM

MgCl<sub>2</sub>, 1 mM EGTA. After the 1 hour Kinase Reaction incubation, 5 µL of a 1:45000 dilution of Development Reagent A is added.

**TEK (Tie2)**

The 2X TEK (Tie2) / Tyr 05 mixture is prepared in 50 mM HEPES pH 7.5, 0.01% BRIJ-35, 10 mM MgCl<sub>2</sub>, 4 mM MnCl<sub>2</sub>, 1 mM EGTA, 2 mM DTT. The final 10 µL Kinase Reaction consists of 1 - 6 ng TEK (Tie2) and 2 µM Tyr 05 in 50 mM HEPES pH 7.5, 0.01% BRIJ-35, 10 mM MgCl<sub>2</sub>, 2 mM MnCl<sub>2</sub>, 1 mM EGTA, 1 mM DTT. After the 1 hour Kinase Reaction incubation, 5 µL of a 1:1024 dilution of Development Reagent A is added.
